# Supplementary material for: Efficient visible light-induced photoelectrocatalytic hydrogen production using CdS sensitized TiO2 nanorods on TiO2 nanotube arrays
Source: Royal Society of Chemistry journal article supplement (doi:10.1039/c5ta04107d), 2015-01-01

## Supplementary Information

**Figure S1.** (A) SEM images of CdS/TNRs/TNTs prepared by hydrothermal reaction for (a) 2 h, (b) 3 h, (c) 4 h, (d) 8 h and S-CBD 15 cycles. (B) J-t curve of CdS/TNRs/TNTs with different hydrothermal reaction times.

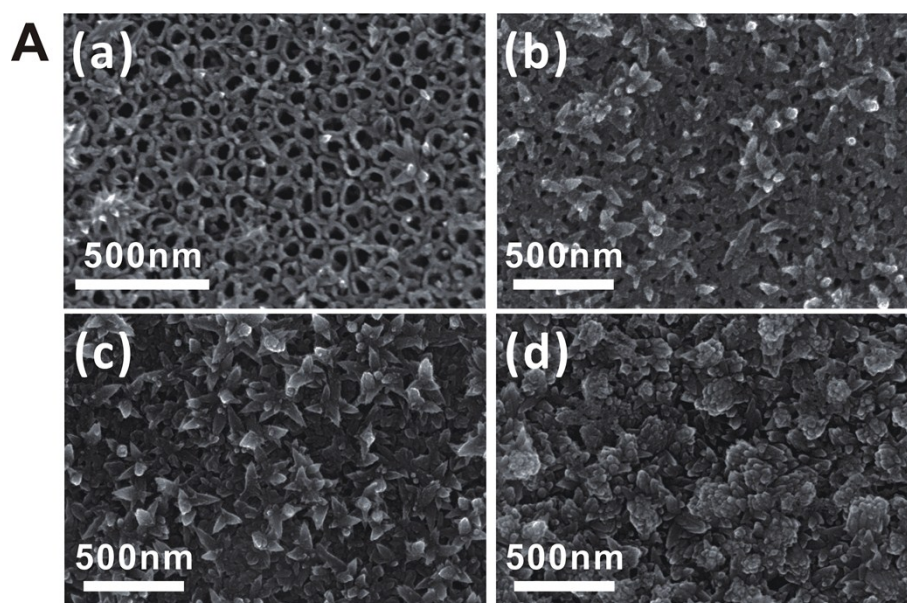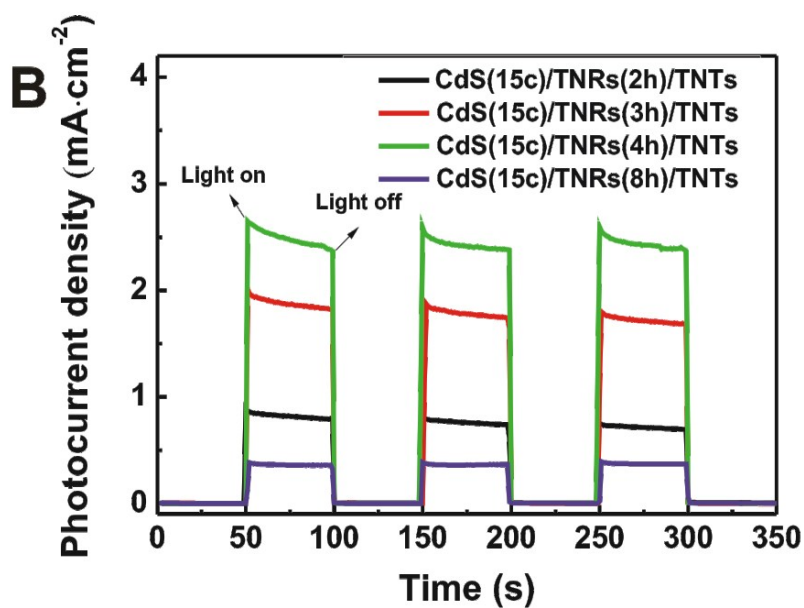

**Figure S2.** J-t curve of CdS/TNRs/TNTs with different S-CBD cycles.

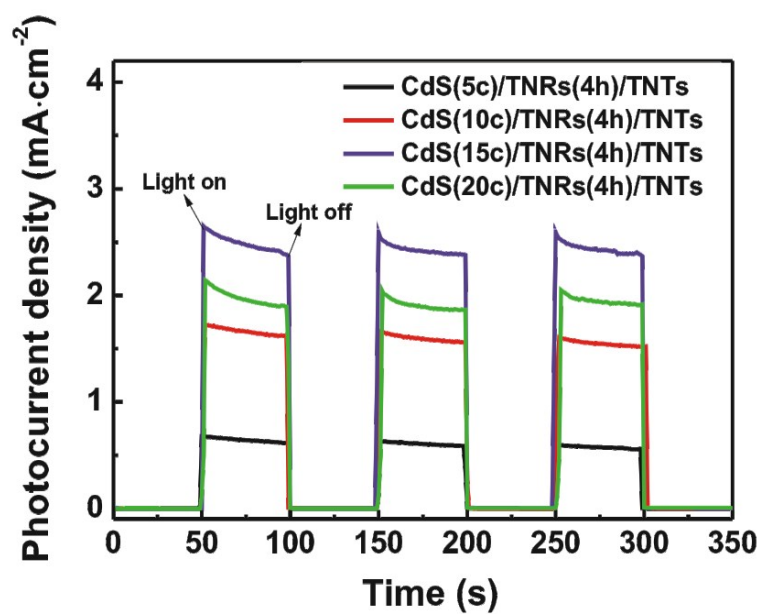

In contrast, CdS/TNRs/TNTs prepared by hydrothermal reaction for 4 h and 15 S-CBD cycles exhibited the highest photocurrent density.

**Figure S3.** (A) SEM images of CdS/TNRs prepared by hydrothermal reaction for 4 h and S-CBD 15 cycles. (B) J-t curve of CdS/TNTs, CdS/TNRs and CdS/TNRs/TNTs.

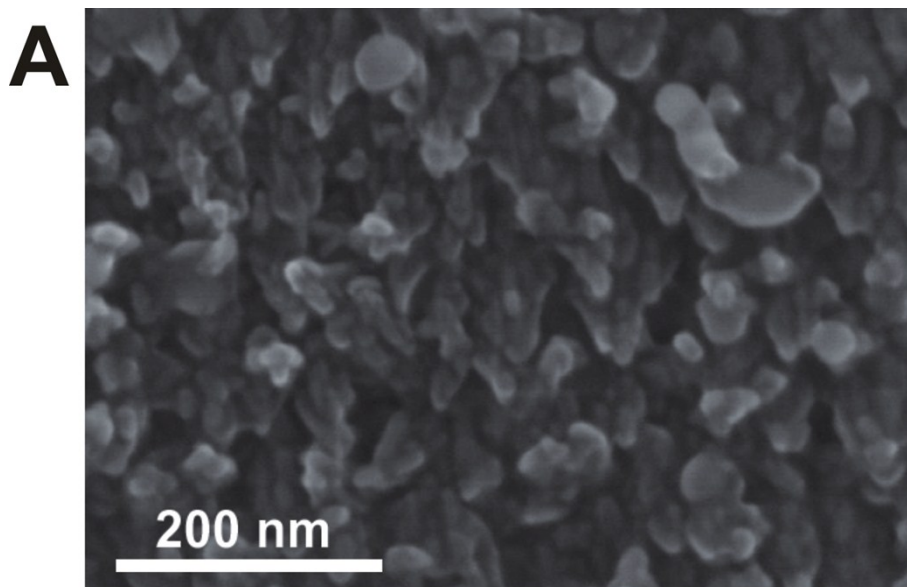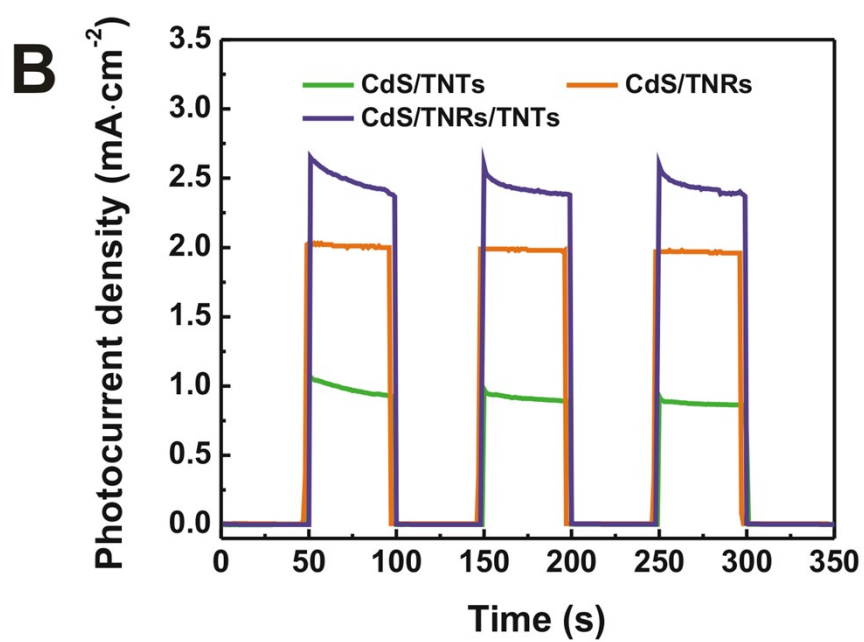

Supplement: c5ta04107d1.pdf [file c5ta04107d1.pdf]
